# Supplementary material for: Essential Oil of Calotropis procera: Comparative Chemical Profiles, Antimicrobial Activity, and Allelopathic Potential on Weeds
Source: PubMed Central journal article supplement (PMC7664932; doi:10.3390/molecules25215203), 2020-11-09
Supplement: molecules-25-05203-s001.pdf [file molecules-25-05203-s001.pdf]

Article

# Essential Oil of *Calotropis procera*: Comparative Chemical Profiles, Antimicrobial Activity, and Allelopathic Potential on Weeds

Saud L. Al-Rowaily <sup>1</sup>, Ahmed M. Abd-ElGawad <sup>1,2,\*</sup>, Abdulaziz M. Assaeed <sup>1</sup>,  
Abdelbaset M. Elgamal <sup>3</sup>, Abd El-Nasser G. El Gendy <sup>4</sup>, Tarik A. Mohamed <sup>5</sup>, Basharat A. Dar <sup>1</sup>,  
Tahia K. Mohamed <sup>6</sup> and Abdelsamed I. Elshamy <sup>6,\*</sup>

<sup>1</sup> Plant Production Department, College of Food & Agriculture Sciences, King Saud University, P.O. Box 2460 Riyadh 11451, Saudi Arabia; srowaily@ksu.edu.sa (S.L.A.-R.); assaeed@ksu.edu.sa (A.M.A.), baseratali@gmail.com (B.A.D.)

<sup>2</sup> Department of Botany, Faculty of Science, Mansoura University, Mansoura 35516, Egypt

<sup>3</sup> Department of chemistry of Microbial and Natural Products, 33 El-Bohouth St., Dokki, Giza 12622, Egypt, algamalgene@yahoo.com

<sup>4</sup> Medicinal and Aromatic Plants Research Department, National Research Centre, 33 El Bohouth St., Dokki, Giza 12622, Egypt; aggundy\_5@yahoo.com

<sup>5</sup> Chemistry of Medicinal Plants Department, National Research Centre, 33 El-Bohouth St., Dokki, Giza 12622, Egypt; tk.mohamed@nrc.sci.eg

<sup>6</sup> Department of Natural Compounds Chemistry, National Research Centre, 33 El Bohouth St., Dokki, Giza, 12622, Egypt; ta.mourad@nrc.sci.eg

\* Correspondence: aibrahim2@ksu.edu.sa (A.M.A.-E.); ai.el-shamy@nrc.sci.eg (A.I.E);  
Tel.: +966-562680864 (A.M.A.-E.), Tel.: +201005525108 (A.I.E.)

Academic Editor: María Amparo Blázquez

Received: 13 October 2020; Accepted: 6 November 2020; Published: 9 November 2020

## Supplementary Materials

**Table 1.** Two-way analysis of variance (ANOVA) of the allelopathic activity of the EOs from Egyptian and Saudi ecospecies of *C. procera* against the two weeds (*B. pilosa* and *D. aegyptium*).

| Microbe             | Effect         | SS       | df | MS      | F       | P           |
|---------------------|----------------|----------|----|---------|---------|-------------|
| <i>B. pilosa</i>    |                |          |    |         |         |             |
| Germination         | Ecospecies (S) | 2430     | 1  | 2430    | 108     | < 0.001 *** |
|                     | Conc. (C)      | 33586.67 | 4  | 8396.67 | 373.19  | < 0.001 *** |
|                     | S × C          | 2320     | 4  | 580     | 25.78   | < 0.001 *** |
| Root growth         | Ecospecies (S) | 443.54   | 1  | 443.54  | 217.80  |             |
|                     | Conc. (C)      | 39233.66 | 4  | 9808.41 | 4816.47 |             |
|                     | S × C          | 157.10   | 4  | 39.28   | 19.29   |             |
| Root growth         | Ecospecies (S) | 721.92   | 1  | 721.92  | 51.72   | < 0.001 *** |
|                     | Conc. (C)      | 36439.99 | 4  | 9110.00 | 652.72  | < 0.001 *** |
|                     | S × C          | 539.98   | 4  | 134.99  | 9.67    | 0.002 ***   |
| <i>D. aegyptium</i> |                |          |    |         |         |             |
| Germination         | Ecospecies (S) | 3796.88  | 1  | 3796.88 | 208.29  | < 0.001 *** |
|                     | Conc. (C)      | 19700.52 | 4  | 4925.13 | 270.18  | < 0.001 *** |
|                     | S × C          | 1085.94  | 4  | 271.48  | 14.89   | < 0.001 *** |
| Root growth         | Ecospecies (S) | 5618.38  | 1  | 5618.38 | 266.62  | < 0.001 *** |
|                     | Conc. (C)      | 19625.54 | 4  | 906.39  | 232.83  | < 0.001 *** |
|                     | S × C          | 3836.06  | 4  | 959.02  | 45.51   | < 0.001 *** |
| Root growth         | Ecospecies (S) | 9474.00  | 1  | 9474.00 | 538.90  | < 0.001 *** |
|                     | Conc. (C)      | 14624.79 | 4  | 3656.20 | 207.97  | < 0.001 *** |
|                     | S × C          | 3906.81  | 4  | 976.70  | 55.56   | < 0.001 *** |

Notes: Tested effects included ecospecies and concentration. For each tested effect, sum of squares (SS), degrees of freedom (df) mean squares (MS) and Duncan's test results (F and associated s value [significant values in boldface type]) are shown. Significance level fixed at  $p$ -values < 0.05. \*\*\*: significant at  $p \leq 0.001$ , ns: non-significant.

**Table 2.** Two-way analysis of variance (ANOVA) of antimicrobial activity of the EOs from Egyptian and Saudi ecospecies of *C. procera* against various bacterial fungal strains.

| Microbe                  | Effect         | SS        | df | MS        | F       | P           |
|--------------------------|----------------|-----------|----|-----------|---------|-------------|
| <i>Bacterial strains</i> |                |           |    |           |         |             |
| <i>S. aureus</i>         | Ecospecies (S) | 979.90    | 1  | 979.90    | 781.08  | < 0.001 *** |
|                          | Conc. (C)      | 586.97    | 5  | 117.39    | 93.58   | < 0.001 *** |
|                          | S × C          | 204.23    | 5  | 40.85     | 32.56   | < 0.001 *** |
| <i>S. pyogenes</i>       | Ecospecies (S) | 0.68      | 1  | 0.68      | 1.09    | 0.306 ns    |
|                          | Conc. (C)      | 786.70    | 5  | 157.34    | 254.99  | < 0.001 *** |
|                          | S × C          | 3.83      | 5  | 0.77      | 1.24    | 0.320 ns    |
| <i>S. epidermidis</i>    | Ecospecies (S) | 826.18    | 1  | 826.18    | 1030.50 | < 0.001 *** |
|                          | Conc. (C)      | 802.40    | 5  | 160.48    | 200.17  | < 0.001 *** |
|                          | S × C          | 179.92    | 5  | 35.98     | 44.88   | < 0.001 *** |
| <i>S. typhi</i>          | Ecospecies (S) | 134.48    | 1  | 134.48    | 298.89  | < 0.001 *** |
|                          | Conc. (C)      | 313.90    | 5  | 62.78     | 139.53  | < 0.001 *** |
|                          | S × C          | 29.32     | 5  | 5.86      | 13.03   | < 0.001 *** |
| <i>E. coli</i>           | Ecospecies (S) | 710.49    | 1  | 710.49    | 951.30  | < 0.001 *** |
|                          | Conc. (C)      | 403.16    | 5  | 80.63     | 107.96  | < 0.001 *** |
|                          | S × C          | 148.60    | 5  | 29.72     | 39.79   | < 0.001 *** |
| <i>Shigella</i> spp.     | Ecospecies (S) | 468.72    | 1  | 468.72    | 147.69  | < 0.001 *** |
|                          | Conc. (C)      | 150.00    | 5  | 30.00     | 9.45    | < 0.001 *** |
|                          | S × C          | 119.70    | 5  | 23.94     | 7.54    | < 0.001 *** |
| <i>P. aeruginosa</i>     | Ecospecies (S) | 33.64     | 1  | 33.64     | 55.65   | < 0.001 *** |
|                          | Conc. (C)      | 334.19    | 5  | 66.84     | 110.58  | < 0.001 *** |
|                          | S × C          | 7.51      | 5  | 1.50      | 2.48    | 0.060 ns    |
| <i>Fungal strains</i>    |                |           |    |           |         |             |
| <i>T. shoenlenii</i>     | Ecospecies (S) | 135829.10 | 1  | 135829.10 | 0.94    | 0.3412 ns   |
|                          | Conc. (C)      | 700372.45 | 5  | 140074.49 | 0.97    | 0.4543 ns   |
|                          | S × C          | 729031.79 | 5  | 145806.36 | 1.01    | 0.4321 ns   |
| <i>A. fumigatus</i>      | Ecospecies (S) | 33063.36  | 1  | 33063.36  | 9337.00 | < 0.001 *** |
|                          | Conc. (C)      | 5761.14   | 5  | 1152.23   | 325.39  | < 0.001 *** |
|                          | S × C          | 2081.14   | 5  | 416.23    | 117.54  | < 0.001 *** |

Notes: Tested effects included ecospecies and concentration. For each tested effect, sum of squares (SS), degrees of freedom (df) mean squares (MS) and Duncan's test results (F and associated s value [significant values in boldface type]) are shown. Significance level fixed at  $p$ -values < 0.05. \*\*\*, significant at  $p \leq 0.001$ , ns: non-significant.
